## Erratum

## New insights into craniofacial morphogenesis

Jill A. Helms, Dwight Cordero and Minal D. Tapadia *Development* **132**, 851-861.

Some of the colour was lost from Figure 2 in this article when it was printed. The online PDF and figures are correct.

The correct figure is reprinted below.

We apologise to the authors and readers for this mistake.

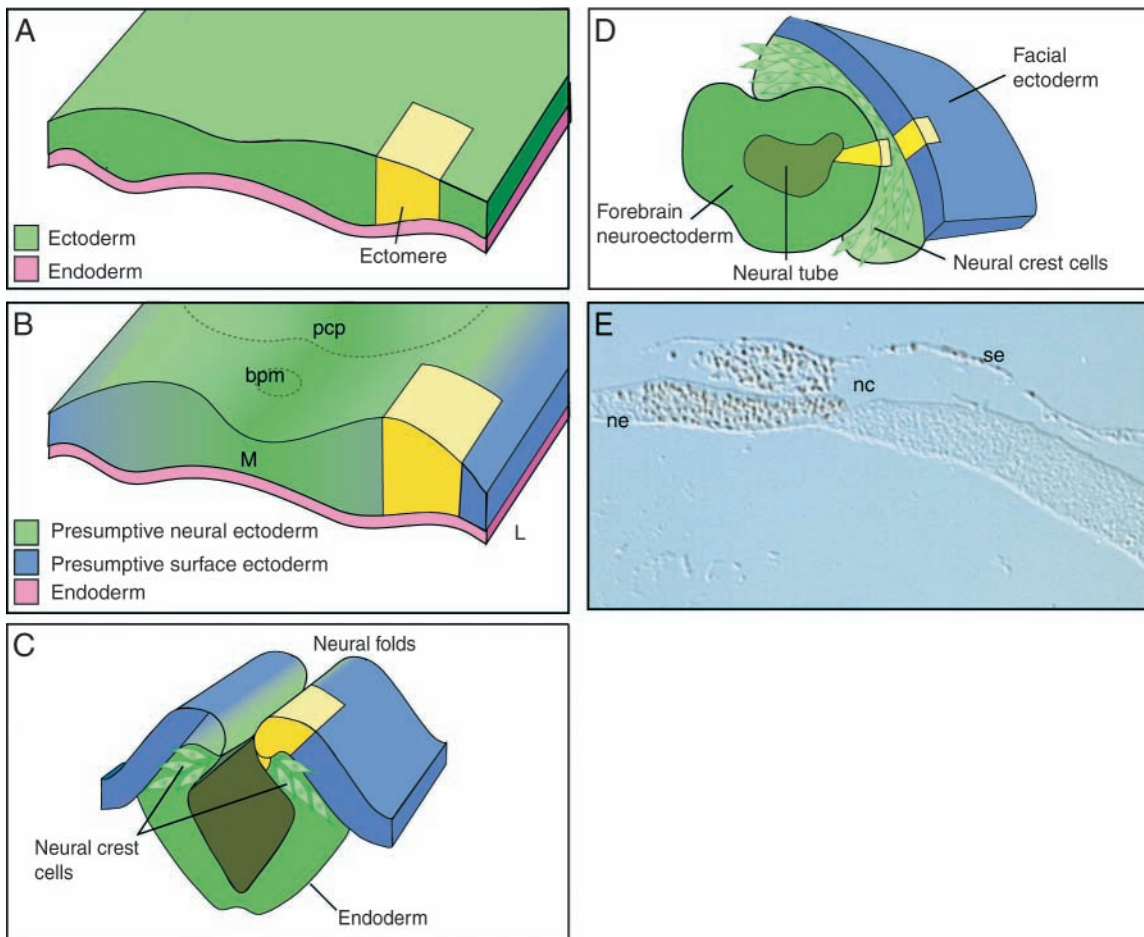

Source: https://cob.silverchair.com/dev/article-pdf/132/12/2929/1508888/2929.pdf
